# Supplementary material for: Microencapsulates of Blue Maize Polyphenolics as a Promising Ingredient in the Food and Pharmaceutical Industry: Characterization, Antioxidant Properties, and In Vitro-Simulated Digestion
Source: MDPI journal article supplement (doi:10.3390/foods12091870), 2023-04-30
Supplement: s1 [file s1]

*blue popping maize*

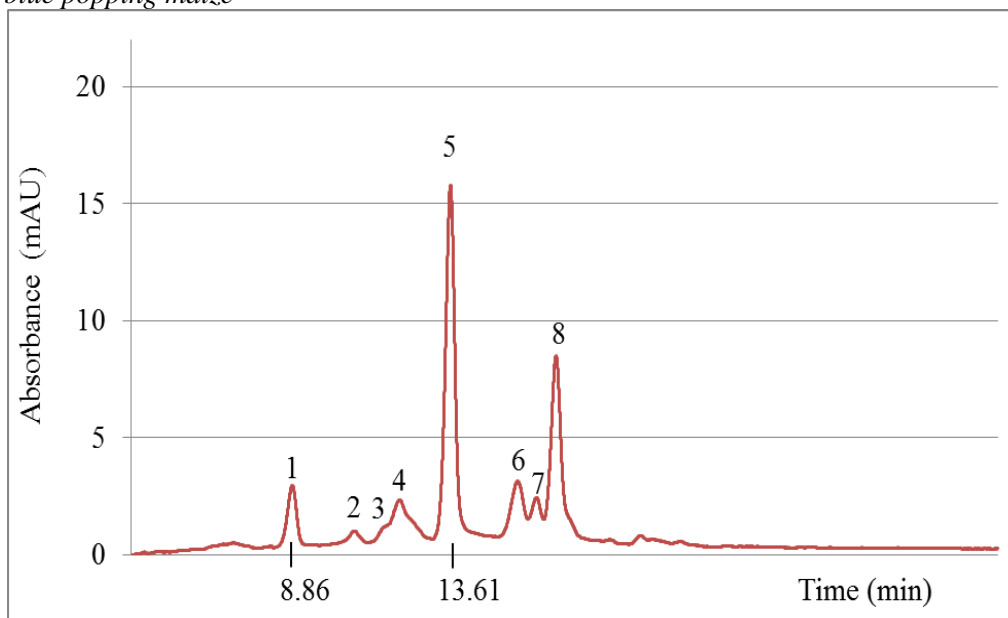

Figure S1. Chromatogram at 530 nm corresponding to blue popping maize. The peak numbers show the major anthocyanins that are identified in Table S1.

Table S1. Anthocyanins composition in grains of blue popping maize. Chromatographic characteristics of peaks in Figure S1.

| Peak | tr<br>(min) | Area (%)<br>(535) | [M <sup>+</sup> ]<br>(m/z) | MS/MS<br>(m/z) | Identity                                        |
|------|-------------|-------------------|----------------------------|----------------|-------------------------------------------------|
| 1    | 8.87        | 6.68              | 449                        | 287            | Cyanidin 3-glucoside                            |
| 2    | 10.73       | 1.40              | 433                        | 271            | Pelargonidin 3-glucoside                        |
| 3    | 11.70       | 1.74              | 463                        | 301            | Peonidin 3-glucoside                            |
| 4    | 12.08       | 6.14              | 535                        | 287            | Cyanidin 3-(3'-malonylglucoside) <sup>1</sup>   |
| 5    | 13.61       | 41.01             | 535                        | 287            | Cyanidin 3-(6'-malonylglucoside) <sup>1</sup>   |
| 6    | 15.63       | 9.73              | 621                        | 438/287        | Cyanidin 3-(dimalonyl-β-glucoside) <sup>2</sup> |
|      | 15.71       | trace             | 519                        | 303            | Pelargonidin 3-(6'-malonylglucoside)            |
| 7    | 16.19       | 5.00              | 621                        | 438/287        | Cyanidin 3-(dimalonyl-β-glucoside) <sup>2</sup> |
|      | 16.60       | trace             | 549                        | 301            | Peonidin 3-(6'-malonylglucoside)                |
| 8    | 16.77       | 23.06             | 621                        | 438/287        | Cyanidin 3-(dimalonyl-β-glucoside) <sup>2</sup> |

<sup>1-2</sup>Compounds with identical m/z ratio within superscript.
